# Supplementary material for: Crosslinking-guided geometry of a complete CXC receptor-chemokine complex and the basis of chemokine subfamily selectivity
Source: PubMed Central journal article supplement (PMC7173943; doi:10.1371/journal.pbio.3000656), 2020-04-09

### Uncropped gels and blots for Fig 3

D187: G3 G3 S5 S5 S5 Y7 Y7 S9 S9  
(vMIP-II) W5: L29 K27 L29 K27 H25 K27 H25 L29 H25

D187: K25 K25 M24 M24 Y21 Y21 M16 G17 K25  
W5: E15 S16 E15 S16 N22 N44 A21 A21 A21

D187: S18 S18 S9 G19 CXCR4  
W5: N22 N44 H17 K27 [P2G]CXCL12

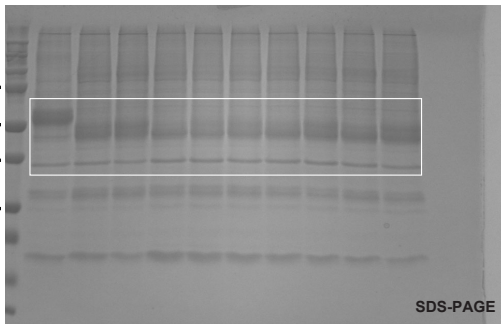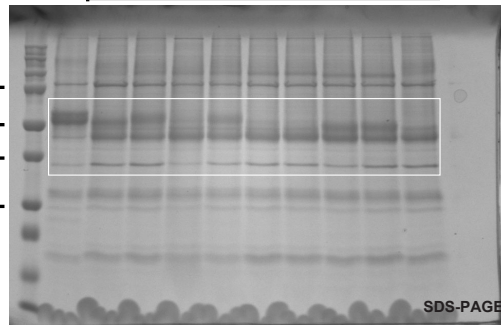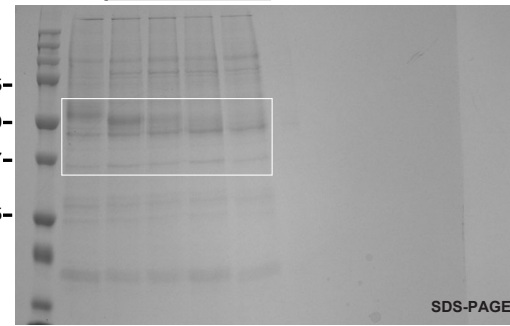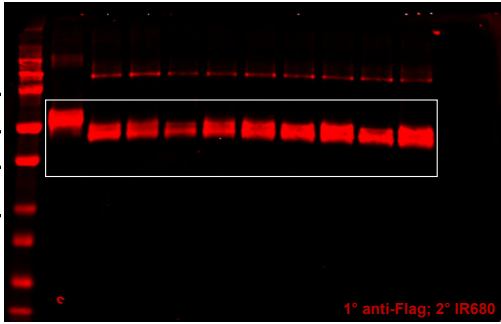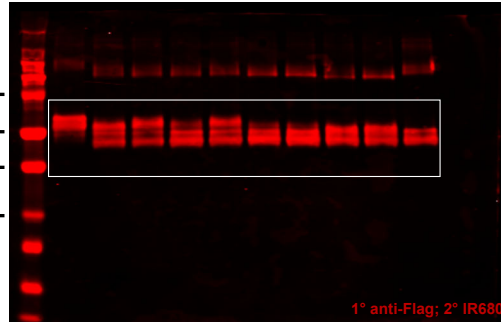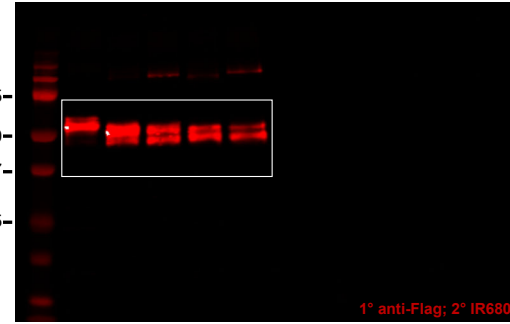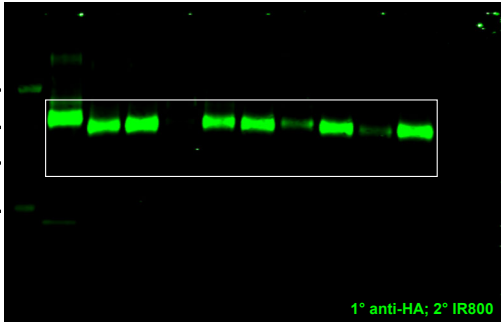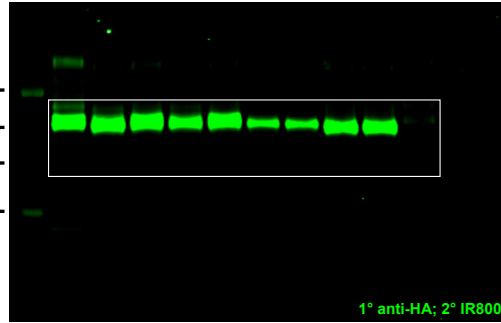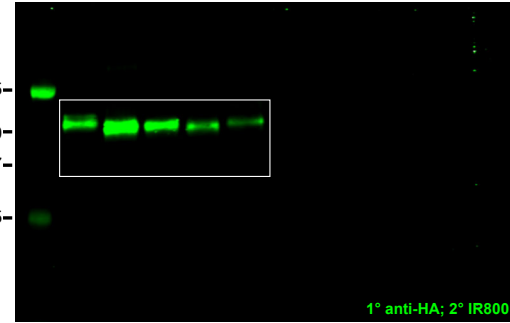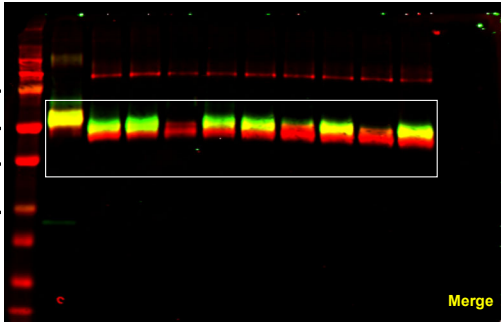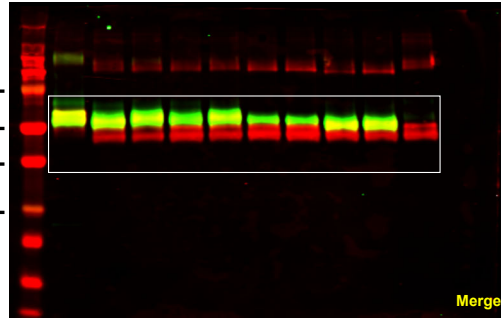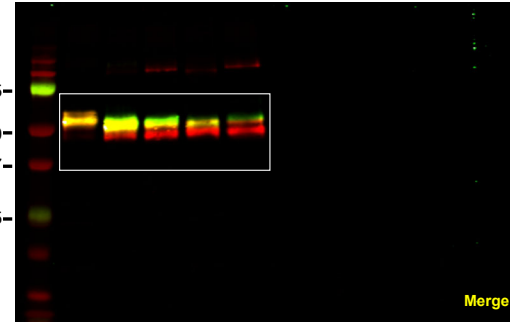

### Uncropped blots for S5 Fig

D187: G3 G3 S5 S5 S5 Y7 Y7 S9 S9  
(vMIP-II) W5: L29 K27 L29 K27 H25 K27 H25 L29 H25

D187: K25 K25 M24 M24 Y21 Y21 M16 G17 K25  
W5: E15 S16 E15 S16 N22 N44 A21 A21 A21

D187: S18 S18 S9 G19 CXCR4  
W5: N22 N44 H17 K27 [P2G]CXCL12

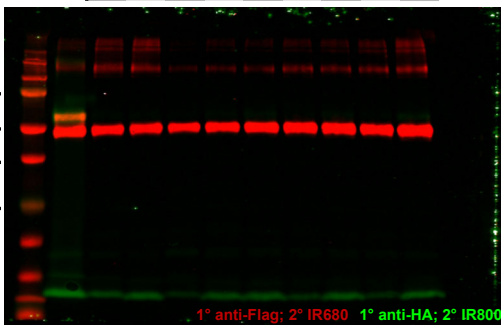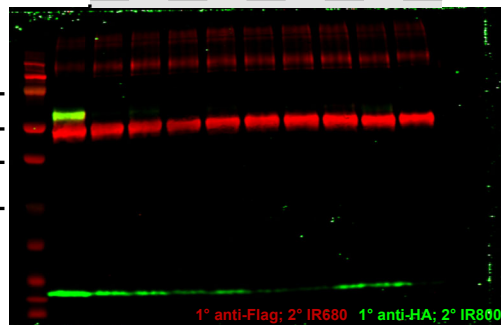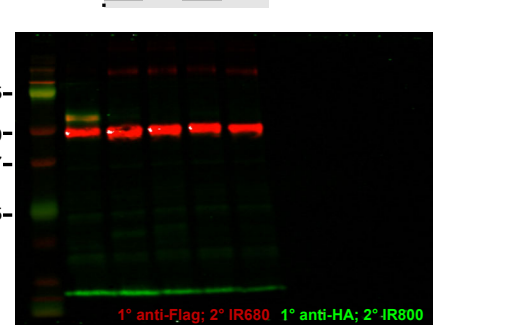

Supplement: pbio.3000656.s001.pdf [file pbio.3000656.s001.pdf]
